# Supplementary material for: Liver epithelial focal adhesion kinase modulates fibrogenesis and hedgehog signaling
Source: JCI journal article supplement (doi:10.1172/jci.insight.141217), 2020-09-10
Supplement: sd1 [file 1]

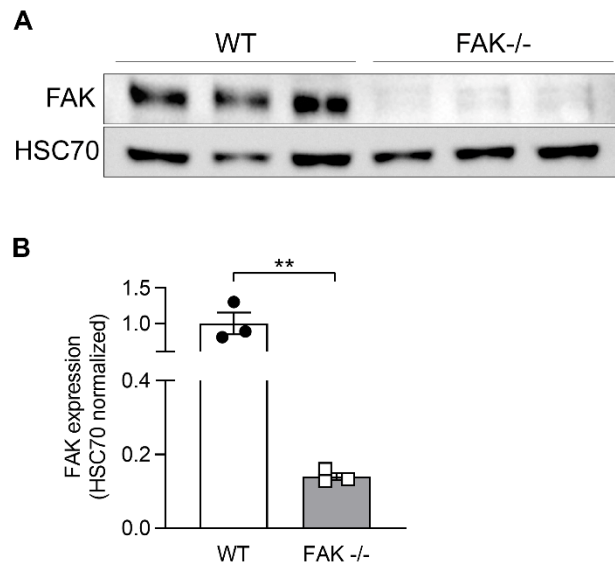

**Supplemental Figure 1. There is efficient deletion of FAK protein expression in the liver of 6-8 week-old FAK<sup>fl/fl</sup>;Alb-cre<sup>+</sup> mice (FAK<sup>-/-</sup>), compared to FAK<sup>fl/fl</sup>;Alb-cre<sup>-</sup> littermate controls (WT). (A)** Western blot shows FAK protein expression in whole liver tissue lysate of WT and FAK<sup>-/-</sup> mice, and HSC70 as the housekeeping loading control. Each lane represents a separate individual animal. **(B)** Quantification of FAK protein expression by densitometry. Expression levels of FAK in the livers of FAK<sup>-/-</sup> mice were <15% of that in WT mice. Sample size is n=3 per group, \*\*p<0.01 by Student's t-test. Data represent individual data points and mean ± SEM.

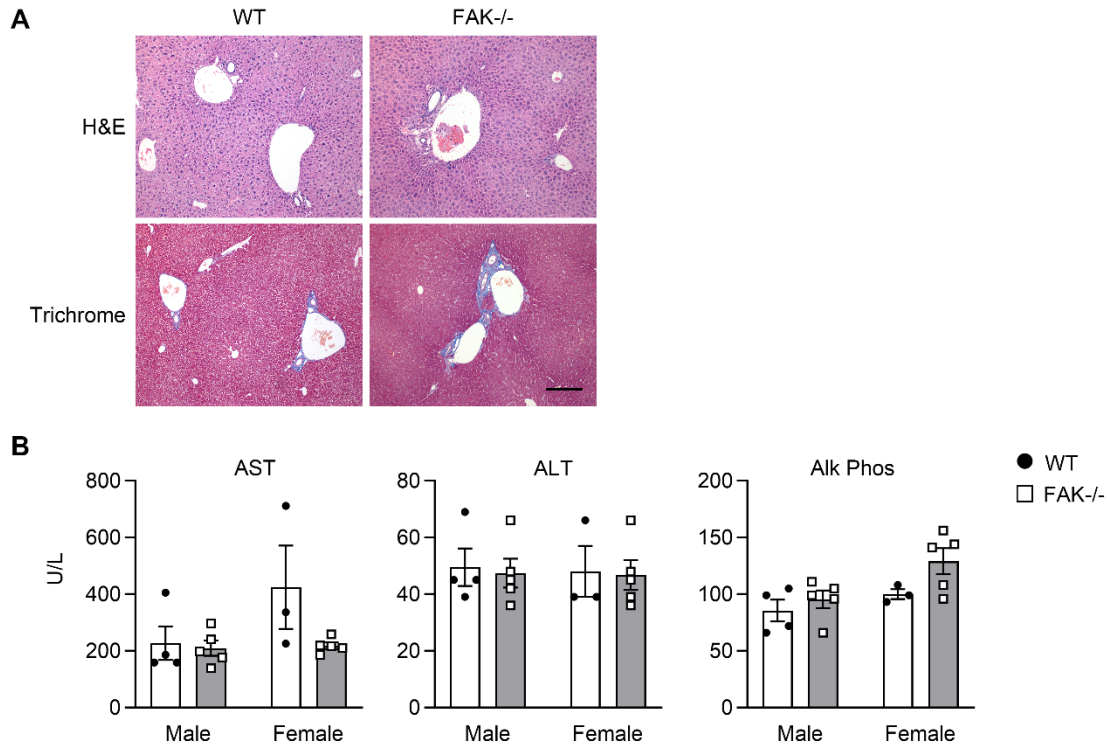

**Supplemental Figure 2. Six-eight week-old FAK<sup>fl/fl</sup>;Alb-cre<sup>+</sup> mice (FAK<sup>-/-</sup>) mice show similar liver histology and serum liver functions tests compared to FAK<sup>fl/fl</sup>;Alb-cre<sup>-</sup> littermate controls (WT). (A) Representative liver H&E and trichrome histology of WT and FAK<sup>-/-</sup> mice. Scale bar=200 $\mu$ m. (B) Serum liver function tests: aspartate transaminase (AST), alanine transaminase (ALT), and alkaline phosphatase (Alk Phos). Sample sizes are WT male n=4, WT female n=3, FAK<sup>-/-</sup> male n=5, and FAK<sup>-/-</sup> female n=5. Data represent individual data points and mean  $\pm$  SEM.**

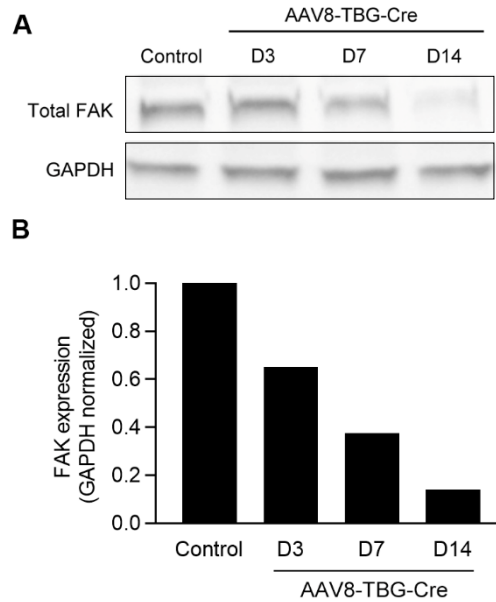

**Supplemental Figure 3.  $FAK^{fl/fl}$  mice treated with AAV8-TBG-Cre show efficient deletion of FAK in the liver after 2 weeks.** (A) Western blot shows FAK protein expression in whole liver tissue lysate of  $FAK^{fl/fl}$  mice (control) and  $FAK^{fl/fl}$  mice treated with AAV8-TBG-Cre after 3, 7, or 14 days. GAPDH was used as the loading control. Each lane represents a separate individual animal. (B) Quantification of FAK protein expression by densitometry. Expression levels of FAK in the livers of AAV8-TBG-Cre-treated  $FAK^{fl/fl}$  mice was <15% of that in control mice at 14 days.

**Supplemental Table 1. qRT-PCR Primer Sequences.**

| Gene Name      | Direction | Sequence 5'->3'         | HBP <sup>A</sup> Primer ID |
|----------------|-----------|-------------------------|----------------------------|
| <i>18s</i>     | Forward   | GTGGAGCGATTTGTCTGGTT    | NA <sup>B</sup>            |
|                | Reverse   | CGCTGAGCCAGTCAGTGTAG    |                            |
| <i>Acta2</i>   | Forward   | GGACGTACAACCTGGTATTGTGC | NA <sup>B</sup>            |
|                | Reverse   | TCGGCAGTAGTCACGAAGGA    |                            |
| <i>Col1a1</i>  | Forward   | GCTCCTCTTAGGGGCCACT     | NA <sup>B</sup>            |
|                | Reverse   | CCACGTCTCACCATTGGGG     |                            |
| <i>Col1a2</i>  | Forward   | GGTGAGCCTGGTCAAACGG     | 111120328c2                |
|                | Reverse   | ACTGTGTCCTTTCACGCCTTT   |                            |
| <i>Col3a1</i>  | Forward   | CTGTAACATGGAAACTGGGGAAA | 20380522a1                 |
|                | Reverse   | CCATAGCTGAACTGAAAACCACC |                            |
| <i>Col5a1</i>  | Forward   | CTTCGCCGCTACTCCTGTTC    | 7656987a1                  |
|                | Reverse   | CCCTGAGGGCAAATTGTGAAAA  |                            |
| <i>Col6a1</i>  | Forward   | CTGCTGCTACAAGCCTGCT     | 6753484a1                  |
|                | Reverse   | CCCATAAGGTTTCAGCCTCA    |                            |
| <i>Col12a1</i> | Forward   | AGGCAGAAGTTGACCCACCT    | 111074528c1                |
|                | Reverse   | CAGTGGTACTAGCTGCAAGGG   |                            |
| <i>Ihh</i>     | Forward   | GACGAGGAGAACACGGGTG     | 31981670c2                 |
|                | Reverse   | GCGGCCCTCATAGTGTAAGA    |                            |
| <i>Smo</i>     | Forward   | GAGCGTAGCTTCCGGGACTA    | 26348965a1                 |
|                | Reverse   | CTGGGCCGATTCTTGATCTCA   |                            |
| <i>Gli2</i>    | Forward   | CAACGCCTACTCTCCAGAC     | 21411092a1                 |
|                | Reverse   | GAGCCTTGATGTACTGTACCAC  |                            |
| <i>Gli3</i>    | Forward   | CACAGCTCTACGGCGACTG     | 6680021a1                  |
|                | Reverse   | CTGCATAGTGATTGCGTTTCTTC |                            |
| <i>Ptch1</i>   | Forward   | AAAGAACTGCGGCAAGTTTTTG  | 6679519a1                  |
|                | Reverse   | CTTCTCCTATCTTCTGACGGGT  |                            |

<sup>A</sup>Harvard Primer Bank. Identification numbers (ID) for primer sequences obtained from HPB are listed. (<http://pga.mgh.harvard.edu/primerbank/citation.html>; Wang X and Seed B. A PCR primer bank for quantitative gene expression analysis. *Nucleic Acids Research*. 2003;31(24): e154; pp.1-8.)

<sup>B</sup>Primers were designed using the online open-source Primer3 software. (Koressaar T, Lepamets M, Kaplinski L, Raime K, Andreson R and Remm M. Primer3\_masker: integrating masking of template sequence with primer design software. *Bioinformatics*. 2018;34(11):1937-1938.)

## **Supplemental Methods**

### **Western Blot**

Whole liver lysates were prepared using Cell Extraction Buffer (Thermo Fisher Scientific, Waltham, MA) supplemented with phenylmethylsulfonyl fluoride and protease inhibitor cocktail (MilliporeSigma, St. Louis, MO). Total protein (25 $\mu$ g) was loaded onto 7.5% polyacrylamide gels for electrophoresis and wet transfer performed onto nitrocellulose membranes. Non-specific binding was blocked using 5% dry milk. Antibodies and dilutions used were total FAK (AHO0502 polyclonal; 1:200 Thermo Fisher Scientific), HSC70 (sc-7298; 1:5000; Santa Cruz Biotechnology, Dallas, TX) and GAPDH (14C10; 1:5000; Cell Signaling, Danvers, MA). Secondary antibodies conjugated with horse radish peroxidase (polyclonal; 1:5000; Jackson ImmunoResearch, West Grove, PA) were applied and chemiluminescent signal developed using the Pierce ECL2 Western Blotting Substrate (Thermo Fisher Scientific). Densitometry calculations were performed using ImageJ software.
